# Supplementary material for: Effect of red wheat, aleurone, and testa layers on colon cancer biomarkers, nitrosative stress, and gut microbiome composition in rats
Source: Royal Society of Chemistry journal article supplement (doi:10.1039/d3fo03438k), 2023-01-01
Supplement: d3fo03438k2.pdf [file d3fo03438k2.pdf]

**Supplementary Table 1** Proximate analysis of wheat flours and fractions (% dry weight basis)<sup>a</sup>

| <b>Wheat flour or fraction</b> | <b>Moisture</b> | <b>Ash</b> | <b>Protein</b> | <b>Fat</b> | <b>Carbohydrate</b> | <b>TDF</b> | <b>IDF</b> | <b>SDF</b> |
|--------------------------------|-----------------|------------|----------------|------------|---------------------|------------|------------|------------|
| Whole hard red spring wheat    | 10.18           | 1.91       | 15.28          | 3.84       | 63.98               | 17.48      | 12.30      | 5.18       |
| Refined hard red spring wheat  | 9.47            | 0.68       | 13.64          | 2.52       | 77.48               | 6.57       | 2.98       | 3.59       |
| Refined soft white wheat       | 11.33           | 0.56       | 8.67           | 2.37       | 82.16               | 6.71       | 3.05       | 3.67       |
| Aleurone-enriched fraction     | 12.04           | 4.26       | 22.85          | 5.67       | 7.63                | 23.65      | 18.30      | 5.34       |
| Testa-enriched fraction        | 12.17           | 4.92       | 19.44          | 5.57       | 10.25               | 43.32      | 5.64       | 37.68      |

<sup>a</sup>Analysis represents a single source of each wheat flour or fraction (N=1).

Abbreviations are as follows: TDF = total dietary fiber; IDF = insoluble dietary fiber; SDF = soluble dietary fiber
